# Supplementary material
Source: publisher site journal article supplement (https://www.dovepress.com/article/462963)
Supplement: Supplementary file 1 [file get_supplementary_file.php]

**Supplementary materials and methods**

**Reagents and** **Materials**

NTP mix (art. No. N0466S), and RNase inhibitors (art. No. M0314L), T7 RNA polymerase (art. No. E2051L), and T7 transcription kit (art. No. E2050S) were purchased from the New England Biological Laboratory (NEB) of the United States. The RNase Alert™ QC System v2 (art. No. 4479769), and TaqMan™ Fast Advanced Master Mix (art. No. 4444557), and Gibco™ HEPES (art. No. 15630080), and MgCl2 (art. No. AM9530G) were purchased from Thermo Scientific, USA. LwaCas13a (art. No. db005) protein was purchased from Nanjing Genscript Biotechnology Co., Ltd. The RAA amplification kits used in the study were procured from ZC Biotechnology Co., Ltd. (Hangzhou, China). 2×Super Pfx MasterMix (art. No. CW2965M) was purchased from Jiangsu Cowin Biotechnology Co., Ltd. Saliva DNA collection and extraction kit was procured from Beijing Genenode Biotech Co., Ltd. DIG-ab (art. No. 190921-5) was purchased from Beijing Jtests Science Co., Ltd; Rabbit anti-FITC polyclonal antibody (art. No. D110003) was purchased from Sangon Biotech Co., Ltd. (Shanghai, China); Streptavidin (art. No. ECL0006G) was purchased from Seebiotech Co., Ltd. (Xi’an, China); nitrocellulose membrane (art. No. 500542922) was purchased from Sartorius Stedim, Germany; goat anti-rabbit Immunoglobulin G (art. No.SPA134) was purchased from Solarbio Co., Ltd. (Beijing, China); colloidal gold particles (art. No. XVAU40) was purchased from Xway Biotech Co., Ltd. (Beijing, China). The lateral flow test strips were produced by Xway Biotech Co., Ltd. (Beijing, China). In this study, all bacterial nucleic acids were sourced from laboratory-preserved strains maintained (Beijing Institute of Microbiology and Epidemiology, Beijing, China). These bacteria encompassed *Streptococcus salivarius*, *Escherichia coli*, *Staphylococcus aureus*, *Klebsiella pneumoniae*, and *Lactobacillus*.

**Preparation of plasmids, primers, probes, and crRNAs**

All *H. pylori* *23S rRNA* gene sequences were obtained from NCBI database (<https://www.ncbi.nLm.nih.gov/>), and sequence alignment was performed using Mega5.0. Primers and probes for the *H. pylori* *23S rRNA* gene were designed according to the reference genome (GenBank ID: NR_076155.1). Each forward primer set was found to contain a T7 promoter sequence (5'-AATTCTAATACGACTCACTATAGGG-3'). We designed wild plasmid (350bp) according to reference strain. Two mutant plasmids were constructed by mutating two base pairs at two most common point mutation sites (A2142G, A2143G). The 5′ end of the labeled upstream and downstream primers were labeled with fluorescein (FAM) and digoxin (DIG). The 3′ and 5′ ends of the PCR-probe were labeled with fluorescein (FAM) and tetramethylrhodamine (TAMRA). Exo probe was designed following the instruction manual of RAA-EXO detection kit (ZC Biotechnology Co., Ltd., Hangzhou, China). All oligonucleotides were synthesized by Tianyi Huiyuan Biotechnology Co., Ltd. CRISPR RNA (crRNA) were designed selected from Hp 23S rRNA gene conserved sequences that contain those two mutation sites. crRNAs were produced by in vitro transcription using the T7 transcription kit (NEB, USA) and purified using phenol-chloroform extraction and ethanol precipitation. Templates for T7 transcription were generated by PCR, containing a T7 promoter at the proximal end followed by the crRNA sequence. The sequences used in this study are detailed in the following Table S1.

**Supplementary Tables**

**Table S1.** Sequences of primer, probe and crRNA.

| Name | Sequence 5’-3’ |
| --- | --- |
| RAA-F1 | AATTCTAATACGACTCACTATAGGGtcagtgaaattgtagtggaggtgaaaattc |
| RAA-F2 | AATTCTAATACGACTCACTATAGGGgagattcagtgaaattgtagtggaggtga |
| RAA-F3 | AATTCTAATACGACTCACTATAGGGctcaaccagagattcagtgaaattgtagtggagg |
| RAA-F4 | AATTCTAATACGACTCACTATAGGGgatgggagctgtctcaaccagagattcagtg |
| RAA-F5 | AATTCTAATACGACTCACTATAGGGacctgcatgaatggcgtaacgagatgggag |
| RAA-R1 | taacagaaacatcaagggtggtatctcaagg |
| RAA-R2 | cagaaacatcaagggtggtatctcaagga |
| RAA-R3 | acttcaaagcctcccacctatcctgcgcat |
| RAA-R4 | agcctcccacctatcctgcgcatgatattccc |
| RAA-R5 | tgcgcatgatattcccgttagcagtgctaa |
| RAA-EXO-probe | ATTCAGTGAAATTGTAGTGGAGGTGAAAAT/i6FAMdT/C/idSp//iBHQ1dT/CCTACCCGCGGCAAG/C3Spacer/i6FAMdT/C/idSp//iBHQ1dT/CCTACCCGCGGCAAG/C3 Spacer |
| RAA-F3l | FAM/AATTCTAATACGACTCACTATAGGGctcaaccagagattcagtgaaattgtagtggagg |
| RAA-R3l | Digoxin/acttcaaagcctcccacctatcctgcgcat |
| T7-crRNA-F | TAATACGACTCACTATAGGGATTTAGACTACCCCAA |
| crRNA1-T | GGGATTTAGACTACCCCAAAAACGAAGGGGACTAAAACaaaggtccacggggtctCCccgtcttgc |
| crRNA2-T | GGGATTTAGACTACCCCAAAAACGAAGGGGACTAAAACtccacggggtctCCccgtcttgccgcgg |
| crRNA3-T | GGGATTTAGACTACCCCAAAAACGAAGGGGACTAAAACgggtctCCccgtcttgccgcgggtagga |
| crRNA4-T | GGGATTTAGACTACCCCAAAAACGAAGGGGACTAAAACgtctCCccgtcttgccgcgggtaggagg |
| crRNA1-R | GCAAGACGGGGAGACCCCGT |
| crRNA2-R | CCGCGGCAAGACGGGGAGAC |
| crRNA3-R | TCCTACCCGCGGCAAGACGG |
| crRNA4-R | CCTCCTACCCGCGGCAAGA |
| QP-F | CCTGCATGAATGGCGTAACG |
| QP-R | CCACCTATCCTGCGCATGAT |
| QP-probe | FAM/CTCCTACCCGCGGCAAGACG/TAMRA |
| Lateral flow strip  reporter RNA | FAM/UUUUUUUUUUUUUUUUUUUU/Biotin |

**Table S2.** UBT-test results of samples.

| Sample | UBT test results |
| --- | --- |
| NO.1 | Negative |
| NO.2 | Positive |
| NO.3 | Negative |
| NO.4 | Positive |
| NO.5 | Positive |
| NO.6 | Positive |
| NO.7 | Positive |
| NO.8 | Positive |
| NO.9 | Positive |
| NO.10 | Positive |
| NO.11 | Positive |
| NO.12 | Positive |
| NO.13 | Positive |
| NO.14 | Negative |
| NO.15 | Negative |
| NO.16 | Positive |
| NO.17 | Positive |
| NO.18 | Positive |
| NO.19 | Positive |
| NO.20 | Positive |
| NO.21 | Positive |
| NO.22 | Positive |
| NO.23 | Negative |
| NO.24 | Positive |
| NO.25 | Positive |
| NO.26 | Negative |
| NO.27 | Positive |
| NO.28 | Positive |


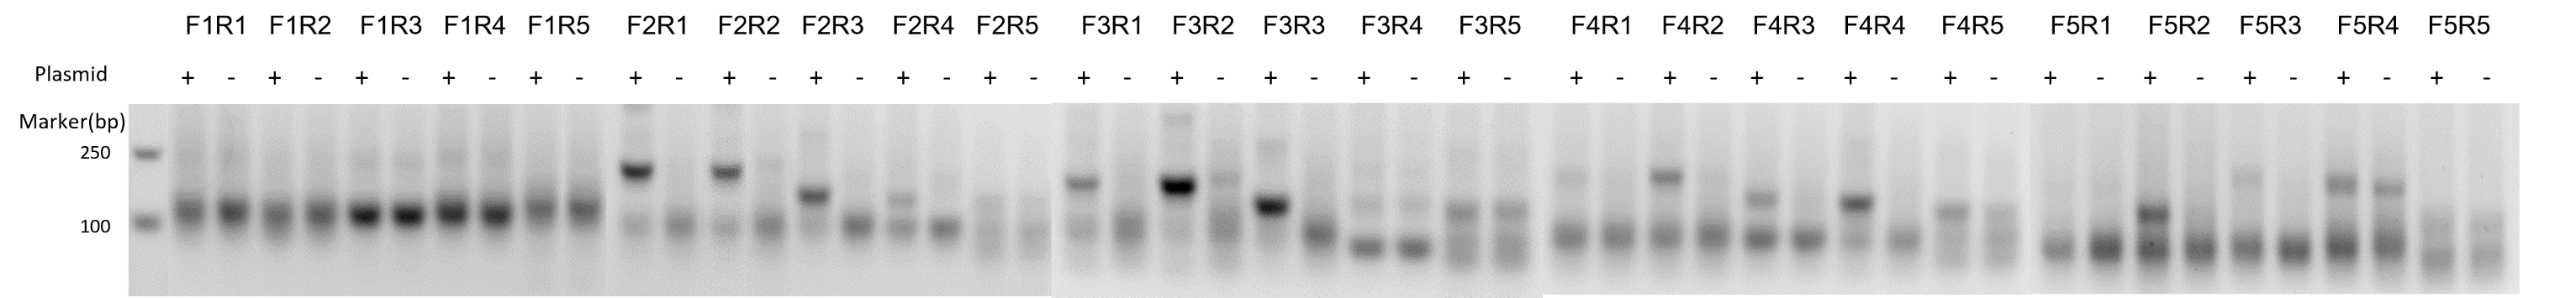


**Figure S1.** Agarose gel electrophoresis was performed to verify the most efficiency pair of primers. The expected bands of F3R3 RAA products can be observed.


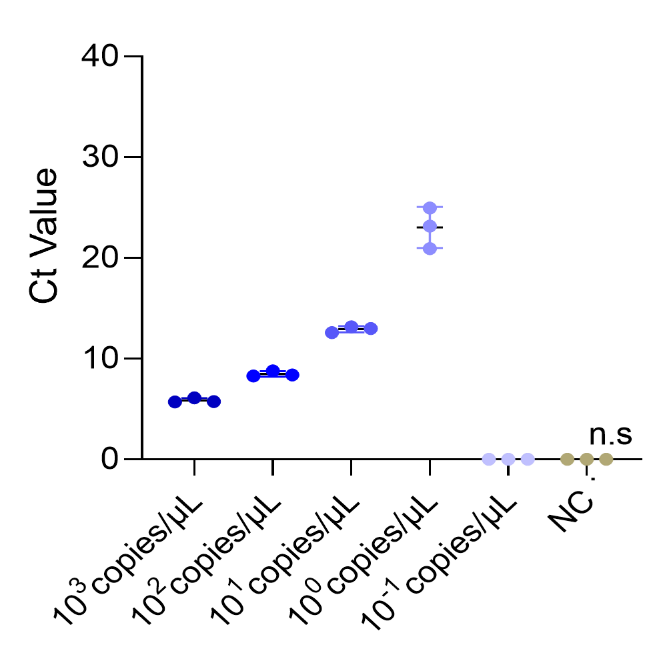


**Figure S2.** Ct Value of RAA fluorescence detection for gradient diluted *H. pylori* plasmid.


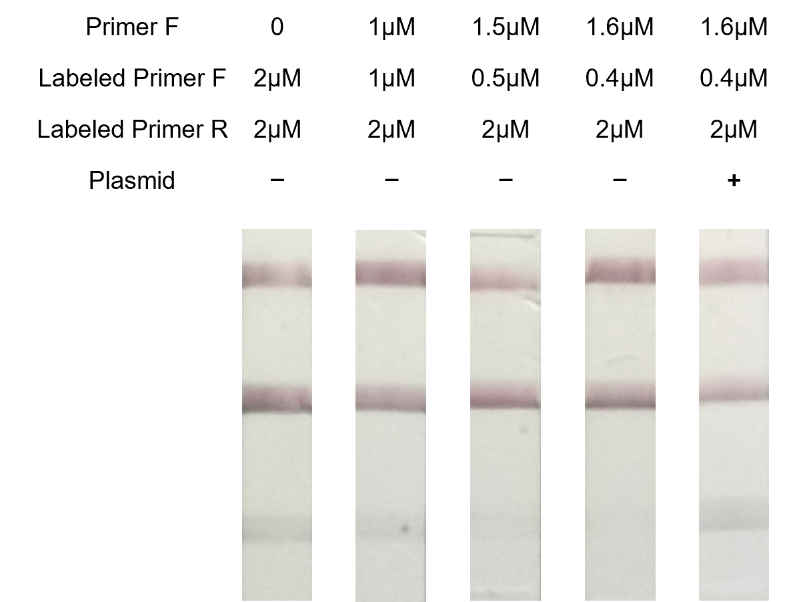


**Figure S3.** Optimize the concentration of the labeled primers to eliminate non-specific band.
